# Supplementary material for: Bifunctional Peptidomimetic G Protein-Biased Mu-Opioid Receptor Agonist and Neuropeptide FF Receptor Antagonist KGFF09 Shows Efficacy in Visceral Pain without Rewarding Effects after Subcutaneous Administration in Mice
Source: MDPI journal article supplement (doi:10.3390/molecules27248785), 2022-12-11
Supplement: s1 [file s1]

## Supporting Material

### **Bifunctional peptidomimetic G protein-biased mu-opioid receptor agonist and neuropeptide FF receptor antagonist KGFF09 shows efficacy in visceral pain without rewarding effects after subcutaneous administration in mice**

Maria Dumitrascuta<sup>1</sup>, Charlotte Martin<sup>2</sup>, Steven Ballet<sup>2</sup>, Mariana Spetea<sup>1,\*</sup>

<sup>1</sup>Department of Pharmaceutical Chemistry, Institute of Pharmacy and Center for Molecular Biosciences Innsbruck (CMBI), University of Innsbruck, Innrain 80-82, 6020 Innsbruck, Austria; maria.dumitrascuta@uibk.ac.at (M.D.)

<sup>2</sup>Departments of Chemistry and Bioengineering Sciences, Vrije Universiteit Brussel, Pleinlaan 2, B-1050 Brussels, Belgium; charlotte.martin@vub.be (C.M.) and steven.ballet@vub.be (S.B.)

\*Correspondence: mariana.spetea@uibk.ac.at (M.S.)

**Table S1.** In vitro profile of **KGFF09** to the human opioid and NPFF receptors<sup>a</sup>

| Receptor     | Binding affinity <sup>b</sup> | Functional activity<br>G protein activation <sup>c</sup> |                      |      | Functional activity<br>β-arrestin2 recruitment <sup>d</sup> |                      |
|--------------|-------------------------------|----------------------------------------------------------|----------------------|------|-------------------------------------------------------------|----------------------|
|              | K <sub>i</sub> (nM)           | EC <sub>50</sub> (nM)                                    | E <sub>max</sub> (%) | pA2  | EC <sub>50</sub> (nM)                                       | E <sub>max</sub> (%) |
| MOR          | 2.43                          | 18.2                                                     | 85                   |      | 1264                                                        | 57                   |
| DOR          | 186                           | 0.79                                                     | 90                   |      |                                                             |                      |
| KOR          | 3.2                           | >10000                                                   | 15                   |      |                                                             |                      |
| NOP receptor | 209                           | >10000                                                   | 7                    |      |                                                             |                      |
| NPFF1R       | 83                            |                                                          | 7.25                 |      |                                                             |                      |
| NPFF2R       | 3.2                           |                                                          |                      | 7.77 |                                                             |                      |

<sup>a</sup>Data from ref. [1]. <sup>b</sup>Determined in radioligand competitive binding assays. <sup>c</sup>Determined in the cAMP accumulation assay (opioid receptors) or [<sup>35</sup>S]GTPγS binding assay (NPFF receptors).

<sup>d</sup>Determined in the BRET β-arrestin-2 recruitment assay.

**Table S2.** In vivo profile of **KGFF09** in mice after s.c. administration

| Behavioral response <sup>a</sup>                | Effect |
|-------------------------------------------------|--------|
| <b>Antinociception</b>                          |        |
| Acute pain model                                |        |
| warm-water tail withdrawal test <sup>a</sup>    | yes    |
| radiant tail-flick test <sup>a</sup>            | yes    |
| Chronic inflammatory pain model                 |        |
| CFA-induced hyperalgesia <sup>a</sup>           | yes    |
| Visceral pain model                             |        |
| Acetic acid-induced writhing assay <sup>b</sup> | yes    |
| <b>Unwanted side effects<sup>c</sup></b>        |        |
| Acute administration                            |        |
| respiratory depression <sup>a</sup>             | no     |
| constipation <sup>a</sup>                       | yes    |
| sedation/motor impairment <sup>a</sup>          | yes    |
| Chronic administration                          |        |
| opioid-induced hyperalgesia <sup>a</sup>        | no     |
| antinociceptive tolerance <sup>a</sup>          | no     |
| withdrawal syndrome <sup>a</sup>                | no     |
| reward <sup>b</sup>                             | no     |
| hyperlocomotion <sup>b</sup>                    | no     |

<sup>a</sup>Data from ref. [1]. Determined in this study. <sup>c</sup>Determined at effective antinociceptive doses.

**Table S3.** Comparison of potencies and efficacies to the human MOR of **KGFF09** in functional in vitro assays for G protein activation and  $\beta$ -arrestin2 recruitment

| Ligand | G protein activation      |                         |                                           |                         | $\beta$ -arrestin2 recruitment |                         |                                             |                         |
|--------|---------------------------|-------------------------|-------------------------------------------|-------------------------|--------------------------------|-------------------------|---------------------------------------------|-------------------------|
|        | cAMP                      |                         | $[^{35}\text{S}]\text{GTP}\gamma\text{S}$ |                         | BRET $\beta$ -arrestin2        |                         | PathHunter                                  |                         |
|        | accumulation <sup>a</sup> |                         | binding <sup>b</sup>                      |                         | recruitment <sup>a</sup>       |                         | $\beta$ -arrestin2 recruitment <sup>c</sup> |                         |
|        | EC <sub>50</sub><br>(nM)  | E <sub>max</sub><br>(%) | EC <sub>50</sub><br>(nM)                  | E <sub>max</sub><br>(%) | EC <sub>50</sub><br>(nM)       | E <sub>max</sub><br>(%) | EC <sub>50</sub><br>(nM)                    | E <sub>max</sub><br>(%) |
| KGFF09 | 18.2                      | 85                      | 8.28                                      | 92                      | 56.4                           | 42                      | 1264                                        | 57                      |
| DAMGO  | 80.4                      | 100                     | 35.0                                      | 100                     | 240                            | 100                     | 367                                         | 100                     |

<sup>a</sup>Data from ref. [1]. <sup>b</sup>Determined in the  $[^{35}\text{S}]\text{GTP}\gamma\text{S}$  binding assay with membranes from CHO cells stably expressing the human MOR. <sup>c</sup>Determined in the PathHunter  $\beta$ -arrestin2 recruitment assay with U2OS cells co-expressing the human MOR and the enzyme acceptor tagged  $\beta$ -arrestin2 fusion protein. E<sub>max</sub> (%) values represent percentage relative to the maximal effect of DAMGO (as 100%).

## Reference

1. Drieu La Rochelle, A.; Guillemyn, K.; Dumitrascuta, M.; Martin, C.; Utard, V.; Quillet, R.; Schneider, S.; Daubeuf, F.; Willemse, T.; Mampuy, P.; Maes, B.U.W.; Frossard, N.; Bihel, F.; Spetea, M.; Simonin, F.; Ballet, S. A bifunctional-biased mu-opioid agonist-neuropeptide FF receptor antagonist as analgesic with improved acute and chronic side effects. *Pain* **2018**, 159, 1705-1718.
